# Supplementary material
Source: PubMed Central journal article supplement (PMC10843609)
Supplement: NIHMS1954327-supplement-Supplementary_Tables_and_Figures.pdf [file NIHMS1954327-supplement-Supplementary_Tables_and_Figures.pdf]

| <b>Table S1.</b> Psychiatric diagnoses and corresponding ICD-9, ICD-10 diagnostic codes |                                                                                                                                                     |                                                                                                  |
|-----------------------------------------------------------------------------------------|-----------------------------------------------------------------------------------------------------------------------------------------------------|--------------------------------------------------------------------------------------------------|
| <b>Psychiatric Disorders</b>                                                            | <b>ICD-9 Code</b>                                                                                                                                   | <b>ICD-10 Code</b>                                                                               |
| Depressive Disorders                                                                    | 296.20-296.25, 296.30-296.35, 296.82, 296.90, 300.4, 301.12, 311.                                                                                   | F32.0-F32.4, F32.8X, F32.9, F32.A, F33.0-F33.3, F33.41, F33.8, F33.9, F34.1, F34.8X, F34.9, F39. |
| Anxiety disorders                                                                       | 300.0X, 300.2X                                                                                                                                      | F40.X, F41.X                                                                                     |
|                                                                                         |                                                                                                                                                     |                                                                                                  |
| Posttraumatic Stress Disorder                                                           | 309.81                                                                                                                                              | F43.10, F43.12                                                                                   |
|                                                                                         |                                                                                                                                                     |                                                                                                  |
| Bipolar Disorder                                                                        | 296.00-296.05, 296.10-296.15, 296.40-296.45, 296.50-296.55, 296.60-296.65, 296.7, 296.80, 296.81, 296.89, 301.13                                    | F30.1X-F30.3, F30.8, F30.9, F34.0                                                                |
| Psychotic Spectrum Disorder                                                             | 295.00-295.04, 295.10-295.14, 295.20-295.24, 295.30-295.34, 295.40-295.44, 295.60-295.64, 295.70-295.74, 295.80-295.84, 295.90-295.94, 297.X, 298.X | F20.0-F20.5, F20.81, F20.9, F21.-F25.X, F28., F29.                                               |

**Table S2a.** Adjusted Prevalences of Psychiatric Disorders in VA Patients, 2005 and 2019, overall and by age group

|                                       | <b>2005</b>        |         | <b>2019</b>        |         |
|---------------------------------------|--------------------|---------|--------------------|---------|
|                                       | n                  | (%)     | n                  | (%)     |
| <b>All ages 18 years and older</b>    | <b>N=4,332,165</b> |         | <b>N=5,657,277</b> |         |
| Any psychiatric disorder <sup>a</sup> | 824,019            | (19.02) | 1,652,604          | (29.21) |
| Depressive disorders                  | 452,950            | (10.46) | 912,804            | (16.14) |
| Anxiety disorders                     | 162,551            | (3.75)  | 574,621            | (10.16) |
| PTSD                                  | 267,671            | (6.18)  | 839,439            | (14.84) |
| Bipolar disorders                     | 72,681             | (1.68)  | 128,146            | (2.27)  |
| Psychotic-spectrum disorders          | 117,671            | (2.72)  | 99,132             | (1.75)  |
| <b>&lt;35 years</b>                   | <b>n=187,692</b>   |         | <b>n=482,749</b>   |         |
| Any psychiatric disorder <sup>a</sup> | 37,912             | (20.20) | 203,386            | (42.13) |

|                                                                                                                                                                    |                    |         |                    |         |
|--------------------------------------------------------------------------------------------------------------------------------------------------------------------|--------------------|---------|--------------------|---------|
| Depressive disorders                                                                                                                                               | 20,571             | (10.96) | 108,160            | (22.41) |
| Anxiety disorders                                                                                                                                                  | 8,367              | (4.46)  | 87,510             | (18.13) |
| PTSD                                                                                                                                                               | 12,817             | (6.83)  | 108,788            | (22.54) |
| Bipolar disorders                                                                                                                                                  | 4,957              | (2.64)  | 16,278             | (3.37)  |
| Psychotic-spectrum disorders                                                                                                                                       | 3,614              | (1.93)  | 8,712              | (1.80)  |
| <b>35-64 years</b>                                                                                                                                                 | <b>n=2,015,250</b> |         | <b>n=2,235,902</b> |         |
| Any psychiatric disorder                                                                                                                                           | 566,190            | (28.10) | 838,489            | (37.50) |
| Depressive disorders                                                                                                                                               | 305,977            | (15.18) | 472,542            | (21.13) |
| Anxiety disorders                                                                                                                                                  | 100,288            | (4.98)  | 307,313            | (13.74) |
| PTSD                                                                                                                                                               | 218,010            | (10.82) | 427,606            | (19.12) |
| Bipolar disorders                                                                                                                                                  | 57,133             | (2.84)  | 80,187             | (3.59)  |
| Psychotic-spectrum disorders                                                                                                                                       | 77,764             | (3.86)  | 53,249             | (2.38)  |
| <b>≥65 years</b>                                                                                                                                                   | <b>n=2,129,223</b> |         | <b>n=2,938,626</b> |         |
| Any psychiatric disorder <sup>a</sup>                                                                                                                              | 219,917            | (10.33) | 610,729            | (20.78) |
| Depressive disorders                                                                                                                                               | 126,402            | (5.94)  | 332,102            | (11.30) |
| Anxiety disorders                                                                                                                                                  | 53,896             | (2.53)  | 179,798            | (6.12)  |
| PTSD                                                                                                                                                               | 36,844             | (1.73)  | 303,045            | (10.31) |
| Bipolar disorders                                                                                                                                                  | 10,591             | (0.50)  | 31,681             | (1.08)  |
| Psychotic-spectrum disorders                                                                                                                                       | 36,293             | (1.70)  | 37,171             | (1.26)  |
| <sup>a</sup> Positive for any disorder from ≥1 of the 5 categories: depressive disorders, anxiety disorders, PTSD, bipolar disorders, psychotic-spectrum disorders |                    |         |                    |         |

**Table S2b.** VA Patient Demographics, overall and by presence or absence of one or more of the psychiatric disorders from the 5 most common categories, 2005 and 2019.

|                    | 2005 (N=4,332,165) |        |                         |        |                                       |        | 2019 (N=5,657,277) |        |                         |        |                                       |        |
|--------------------|--------------------|--------|-------------------------|--------|---------------------------------------|--------|--------------------|--------|-------------------------|--------|---------------------------------------|--------|
|                    | Overall            |        | No Psychiatric Disorder |        | Any Psychiatric Disorder <sup>a</sup> |        | Overall            |        | No Psychiatric Disorder |        | Any Psychiatric Disorder <sup>a</sup> |        |
|                    | n                  | (%)    | n                       | (%)    | n                                     | (%)    | n                  | (%)    | n                       | (%)    | n                                     | (%)    |
| <b>Overall</b>     |                    |        | <b>n=3,508,146</b>      |        | <b>n=824,019</b>                      |        |                    |        | <b>n=4,004,673</b>      |        | <b>n=1,652,604</b>                    |        |
| Sex                |                    |        |                         |        |                                       |        |                    |        |                         |        |                                       |        |
| Female             | 216,961            | (5.0)  | 152,505                 | (4.4)  | 64,456                                | (7.8)  | 522,707            | (9.2)  | 284,660                 | (7.1)  | 238,047                               | (14.4) |
| Male               | 4,115,199          | (95.0) | 3,355,636               | (95.7) | 759,563                               | (92.2) | 5,134,565          | (90.8) | 3,720,009               | (93.0) | 1,414,556                             | (85.6) |
| Race/Ethnicity     |                    |        |                         |        |                                       |        |                    |        |                         |        |                                       |        |
| Non-Hispanic White | 3,407,953          | (78.7) | 2,782,872               | (79.3) | 625,081                               | (75.9) | 3,978,984          | (70.3) | 2,901,865               | (72.5) | 1,077,119                             | (65.2) |
| Non-Hispanic Black | 605,523            | (14.0) | 473,295                 | (13.5) | 132,228                               | (16.1) | 1,017,033          | (18.0) | 664,225                 | (16.6) | 352,808                               | (21.4) |
| Hispanic/Latino    | 140,871            | (3.3)  | 107,547                 | (3.1)  | 33,324                                | (4.0)  | 342,413            | (6.1)  | 213,745                 | (5.3)  | 128,668                               | (7.8)  |
| Other/Multiple     | 99,714             | (2.3)  | 77,855                  | (2.2)  | 21,859                                | (2.7)  | 187,997            | (3.3)  | 125,545                 | (3.1)  | 62,452                                | (3.8)  |
| Unknown            | 78,104             | (1.8)  | 66,577                  | (1.9)  | 11,527                                | (1.4)  | 130,850            | (2.3)  | 99,293                  | (2.5)  | 31,557                                | (1.9)  |
| Age                |                    |        |                         |        |                                       |        |                    |        |                         |        |                                       |        |
| <35                | 187,692            | (4.3)  | 149,780                 | (4.3)  | 37,912                                | (4.6)  | 482,749            | (8.5)  | 279,363                 | (7.0)  | 203,386                               | (12.3) |
| 35-64              | 2,015,250          | (46.5) | 1,449,060               | (41.3) | 566,190                               | (68.7) | 2,235,902          | (39.5) | 1,397,413               | (34.9) | 838,489                               | (50.7) |
| 65+                | 2,129,223          | (49.2) | 1,909,306               | (54.4) | 219,917                               | (26.7) | 2,938,626          | (51.9) | 2,327,897               | (58.1) | 610,729                               | (37.0) |
| Age, M(SD)         |                    |        | 64.8                    | (14.7) | 58.4                                  | (13.5) |                    |        | 64.4                    | (16.4) | 56.0                                  | (16.0) |

|                 |           |        |                    |        |                  |        |           |        |                    |        |                  |        |
|-----------------|-----------|--------|--------------------|--------|------------------|--------|-----------|--------|--------------------|--------|------------------|--------|
| <b>&lt;35</b>   |           |        | <b>n=149,780</b>   |        | <b>n=37,912</b>  |        |           |        | <b>n=279,363</b>   |        | <b>n=203,386</b> |        |
| Sex             |           |        |                    |        |                  |        |           |        |                    |        |                  |        |
| Female          | 43,221    | (23.0) | 32,967             | (22.0) | 10,254           | (27.1) | 95,330    | (19.8) | 48,122             | (17.2) | 47,208           | (23.2) |
| Male            | 144,471   | (77.0) | 116,813            | (78.0) | 27,658           | (73.0) | 387,419   | (80.3) | 231,241            | (82.8) | 156,178          | (76.8) |
| Race/Ethnicity  |           |        |                    |        |                  |        |           |        |                    |        |                  |        |
| White           | 110,641   | (59.0) | 85,123             | (56.8) | 25,518           | (67.0) | 286,132   | (59.3) | 163,776            | (58.6) | 122,356          | (60.2) |
| Black           | 37,011    | (19.7) | 30,617             | (20.4) | 6,394            | (16.9) | 80,380    | (16.7) | 44,342             | (15.9) | 36,038           | (17.7) |
| Hispanic/Latino | 16,556    | (8.8)  | 13,664             | (9.1)  | 2,892            | (7.6)  | 64,013    | (13.3) | 37,126             | (13.3) | 26,887           | (13.2) |
| Other/Multiple  | 7,119     | (3.8)  | 5,689              | (3.8)  | 1,430            | (3.8)  | 27,335    | (5.7)  | 16,031             | (5.7)  | 11,304           | (5.6)  |
| Unknown         | 16,365    | (8.7)  | 14,687             | (9.8)  | 1,678            | (4.4)  | 24,889    | (5.2)  | 18,088             | (6.5)  | 6,801            | (3.3)  |
| Age, M(SD)      |           |        | 28.0               | (3.9)  | 28.7             | (3.8)  |           |        | 29.5               | (3.3)  | 30.2             | (3.1)  |
| <b>35-64</b>    |           |        |                    |        |                  |        |           |        |                    |        |                  |        |
|                 |           |        | <b>n=1,449,060</b> |        | <b>n=566,190</b> |        |           |        | <b>n=1,397,413</b> |        | <b>n=838,489</b> |        |
| Sex             |           |        |                    |        |                  |        |           |        |                    |        |                  |        |
| Female          | 86,773    | (6.0)  | 86,773             | (6.0)  | 48,041           | (8.5)  | 181,474   | (13.0) | 181,474            | (13.0) | 164,740          | (19.7) |
| Male            | 1,362,285 | (94.0) | 1,362,285          | (94.0) | 518,149          | (91.5) | 1,215,937 | (87.0) | 1,215,937          | (87.0) | 673,748          | (80.4) |
| Race/Ethnicity  |           |        |                    |        |                  |        |           |        |                    |        |                  |        |
| White           | 1,000,537 | (69.1) | 1,000,537          | (69.1) | 406,905          | (71.9) | 816,049   | (58.4) | 816,049            | (58.4) | 489,828          | (58.4) |
| Black           | 305,575   | (21.1) | 305,575            | (21.1) | 109,189          | (19.3) | 355,695   | (25.5) | 355,695            | (25.5) | 219,774          | (26.2) |
| Hispanic/Latino | 57,053    | (3.9)  | 57,053             | (3.9)  | 24,835           | (4.4)  | 98,268    | (7.0)  | 98,268             | (7.0)  | 71,762           | (8.6)  |
| Other/Multiple  | 38,816    | (2.7)  | 38,816             | (2.7)  | 16,118           | (2.9)  | 54,629    | (3.9)  | 54,629             | (3.9)  | 34,277           | (4.1)  |

|                                                                                                                                                                    |           |        |                    |        |                  |        |           |        |                    |        |                  |        |
|--------------------------------------------------------------------------------------------------------------------------------------------------------------------|-----------|--------|--------------------|--------|------------------|--------|-----------|--------|--------------------|--------|------------------|--------|
| Unknown                                                                                                                                                            | 47,079    | (3.3)  | 47,079             | (3.3)  | 9,143            | (1.6)  | 72,772    | (5.2)  | 72,772             | (5.2)  | 22,848           | (2.7)  |
| Age, M(SD)                                                                                                                                                         | 54.0      | (7.4)  | 54.0               | (7.4)  | 53.6             | (6.9)  | 52.4      | (8.6)  | 52.4               | (8.6)  | 50.2             | (9.0)  |
| <b>≥65</b>                                                                                                                                                         |           |        |                    |        |                  |        |           |        |                    |        |                  |        |
|                                                                                                                                                                    |           |        | <b>n=1,909,306</b> |        | <b>n=219,917</b> |        |           |        | <b>n=2,327,897</b> |        | <b>n=610,729</b> |        |
| Sex                                                                                                                                                                |           |        |                    |        |                  |        |           |        |                    |        |                  |        |
| Female                                                                                                                                                             | 32,765    | (1.7)  | 32,765             | (1.7)  | 6,161            | (2.8)  | 55,064    | (2.4)  | 55,064             | (2.4)  | 26,099           | (4.3)  |
| Male                                                                                                                                                               | 1,876,538 | (98.3) | 1,876,538          | (98.3) | 213,756          | (97.2) | 2,272,831 | (97.6) | 2,272,831          | (97.6) | 584,630          | (95.7) |
| Race/Ethnicity                                                                                                                                                     |           |        |                    |        |                  |        |           |        |                    |        |                  |        |
| White                                                                                                                                                              | 1,697,212 | (88.9) | 1,697,212          | (88.9) | 192,658          | (87.6) | 1,922,040 | (82.6) | 1,922,040          | (82.6) | 464,935          | (76.1) |
| Black                                                                                                                                                              | 137,103   | (7.2)  | 137,103            | (7.2)  | 16,645           | (7.6)  | 264,188   | (11.4) | 264,188            | (11.4) | 96,996           | (15.9) |
| Hispanic/Latino                                                                                                                                                    | 36,830    | (1.9)  | 36,830             | (1.9)  | 5,597            | (2.6)  | 78,351    | (3.4)  | 78,351             | (3.4)  | 30,019           | (4.9)  |
| Other/Multiple                                                                                                                                                     | 33,350    | (1.8)  | 33,350             | (1.8)  | 4,311            | (2.0)  | 54,885    | (2.4)  | 54,885             | (2.4)  | 16,871           | (2.8)  |
| Unknown                                                                                                                                                            | 4,811     | (0.3)  | 4,811              | (0.3)  | 706              | (0.3)  | 8,433     | (0.4)  | 8,433              | (0.4)  | 1,908            | (0.3)  |
| Age, M(SD)                                                                                                                                                         | 75.8      | (6.4)  | 75.8               | (6.4)  | 75.8             | (6.6)  | 75.7      | (7.5)  | 75.7               | (7.5)  | 72.6             | (5.8)  |
| <sup>a</sup> Positive for any disorder from ≥1 of the 5 categories: depressive disorders, anxiety disorders, PTSD, bipolar disorders, psychotic-spectrum disorders |           |        |                    |        |                  |        |           |        |                    |        |                  |        |

**Table S3.** Age-Stratified Change in the Diagnostic Prevalence of CUD by 5 Categories of Psychiatric Disorders<sup>a</sup> in VA patients, 2005-2019.

|                             | Predicted Prevalence of ICD-9-CM CUD diagnoses,<br>2005-2014 <sup>b</sup> |            |       |             |              |                    | Predicted Prevalence of ICD-10-CM CUD diagnoses,<br>2016-2019 <sup>b</sup> |             |       |             |             |                  |
|-----------------------------|---------------------------------------------------------------------------|------------|-------|-------------|--------------|--------------------|----------------------------------------------------------------------------|-------------|-------|-------------|-------------|------------------|
|                             | 2005                                                                      |            | 2014  |             | Change       | 95% CI             | 2016                                                                       |             | 2019  |             | Change      | 95% CI           |
|                             | %                                                                         | 95% CI     | %     | 95% CI      |              |                    | %                                                                          | 95% CI      | %     | 95% CI      |             |                  |
| <b>Depressive disorders</b> |                                                                           |            |       |             |              |                    |                                                                            |             |       |             |             |                  |
| <35                         | 5.27                                                                      | 4.96-5.58  | 10.34 | 10.14-10.53 | <b>5.06</b>  | <b>4.70-5.43</b>   | 10.30                                                                      | 10.10-10.49 | 10.14 | 9.96-10.32  | -0.16       | -0.42-0.11       |
| 35-64                       | 4.25                                                                      | 4.18-4.32  | 6.92  | 6.85-7.00   | <b>2.67</b>  | <b>2.57-2.78</b>   | 6.21                                                                       | 6.13-6.28   | 6.58  | 6.51-6.65   | <b>0.37</b> | <b>0.27-0.48</b> |
| ≥65                         | 0.22                                                                      | 0.19-0.26  | 1.72  | 1.67-1.76   | <b>1.49</b>  | <b>1.44-1.55</b>   | 1.98                                                                       | 1.93-2.03   | 2.99  | 2.93-3.05   | <b>1.01</b> | <b>0.93-1.09</b> |
| <b>Anxiety disorders</b>    |                                                                           |            |       |             |              |                    |                                                                            |             |       |             |             |                  |
| <35                         | 5.15                                                                      | 4.68-5.63  | 10.61 | 10.38-10.84 | <b>5.45</b>  | <b>4.93-5.98</b>   | 10.82                                                                      | 10.59-11.05 | 10.74 | 10.53-10.94 | -0.09       | -0.40-0.22       |
| 35-64                       | 3.71                                                                      | 3.59-3.82  | 7.47  | 7.36-7.58   | <b>3.76</b>  | <b>3.60-3.92</b>   | 7.01                                                                       | 6.90-7.12   | 7.56  | 7.47-7.66   | <b>0.55</b> | <b>0.41-0.70</b> |
| ≥65                         | 0.14                                                                      | 0.10-0.18  | 1.64  | 1.58-1.70   | <b>1.50</b>  | <b>1.43-1.58</b>   | 1.96                                                                       | 1.89-2.04   | 3.14  | 3.06-3.23   | <b>1.18</b> | <b>1.07-1.29</b> |
| <b>PTSD</b>                 |                                                                           |            |       |             |              |                    |                                                                            |             |       |             |             |                  |
| <35                         | 4.84                                                                      | 4.47-5.20  | 10.41 | 10.23-10.58 | <b>5.57</b>  | <b>5.16-5.97</b>   | 10.33                                                                      | 10.15-10.50 | 11.69 | 11.49-11.89 | <b>1.36</b> | <b>1.10-1.63</b> |
| 35-64                       | 3.98                                                                      | 3.90-4.07  | 6.82  | 6.73-6.92   | <b>2.84</b>  | <b>2.71-2.96</b>   | 6.05                                                                       | 5.97-6.14   | 6.61  | 6.54-6.69   | <b>0.56</b> | <b>0.45-0.67</b> |
| ≥65                         | 0.38                                                                      | 0.29-0.47  | 2.08  | 2.03-2.14   | <b>1.70</b>  | <b>1.60-1.81</b>   | 2.22                                                                       | 2.16-2.27   | 3.77  | 3.69-3.86   | <b>1.56</b> | <b>1.46-1.65</b> |
| <b>Bipolar disorders</b>    |                                                                           |            |       |             |              |                    |                                                                            |             |       |             |             |                  |
| <35                         | 10.67                                                                     | 9.82-11.53 | 22.09 | 21.43-22.75 | <b>11.41</b> | <b>10.33-12.49</b> | 22.28                                                                      | 21.62-22.93 | 23.78 | 23.13-24.43 | <b>1.50</b> | <b>0.58-2.43</b> |
| 35-64                       | 7.34                                                                      | 7.13-7.55  | 13.10 | 12.87-13.33 | <b>5.76</b>  | <b>5.45-6.07</b>   | 12.61                                                                      | 12.37-12.85 | 14.77 | 14.52-15.01 | <b>2.16</b> | <b>1.82-2.50</b> |
| ≥65                         | 0.56                                                                      | 0.39-0.72  | 3.74  | 3.52-3.96   | <b>3.19</b>  | <b>2.91-3.46</b>   | 4.42                                                                       | 4.18-4.67   | 6.71  | 6.43-6.99   | <b>2.29</b> | <b>1.92-2.66</b> |
| <b>Psychotic disorders</b>  |                                                                           |            |       |             |              |                    |                                                                            |             |       |             |             |                  |

|       |       |             |       |             |              |                    |       |             |       |             |             |                  |
|-------|-------|-------------|-------|-------------|--------------|--------------------|-------|-------------|-------|-------------|-------------|------------------|
| <35   | 12.39 | 11.32-13.46 | 30.24 | 29.28-31.21 | <b>17.85</b> | <b>16.41-19.29</b> | 31.11 | 30.13-32.09 | 33.66 | 32.67-34.65 | <b>2.54</b> | <b>1.15-3.94</b> |
| 35-64 | 6.07  | 5.91-6.23   | 12.89 | 12.65-13.14 | <b>6.82</b>  | <b>6.53-7.12</b>   | 12.61 | 12.34-12.87 | 15.69 | 15.39-16.00 | <b>3.09</b> | <b>2.68-3.49</b> |
| ≥65   | 0.35  | 0.27-0.44   | 2.82  | 2.67-2.97   | <b>2.47</b>  | <b>2.29-2.64</b>   | 3.11  | 2.94-3.28   | 4.85  | 4.65-5.04   | <b>1.74</b> | <b>1.48-2.00</b> |

<sup>a</sup> Categories are not mutually exclusive.

<sup>b</sup> Models include year, mental health condition, year X mental health condition, sex, race/ethnicity, continuous age.

Note: Bolded values indicate statistically significant change in prevalence of CUD from 2005 to 2014 and 2016-2019.

**Figures S1a-S1c.** Age-Stratified Trends in Prevalence of CUD by Any Psychiatric Disorder<sup>a</sup> in VA Patients, 2005-2019

**Figure S1a.** Prevalence of CUD by Any Psychiatric Disorder, <35 Years

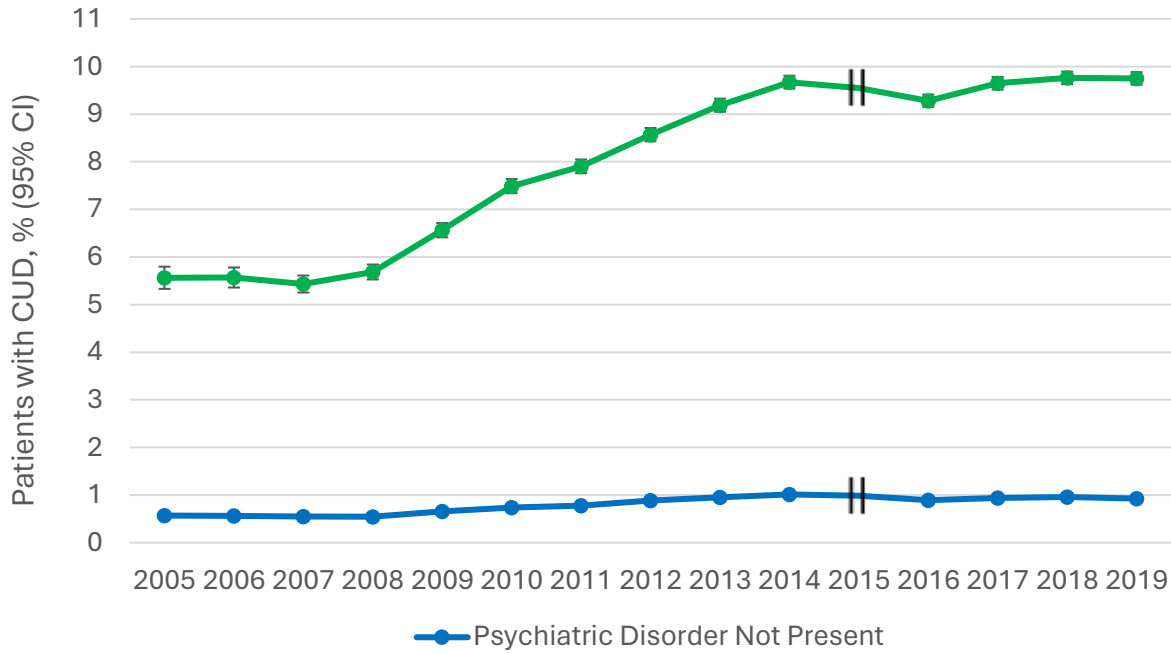

**Figure S1b.** Prevalence of CUD by Any Psychiatric Disorder, 35-64 Years

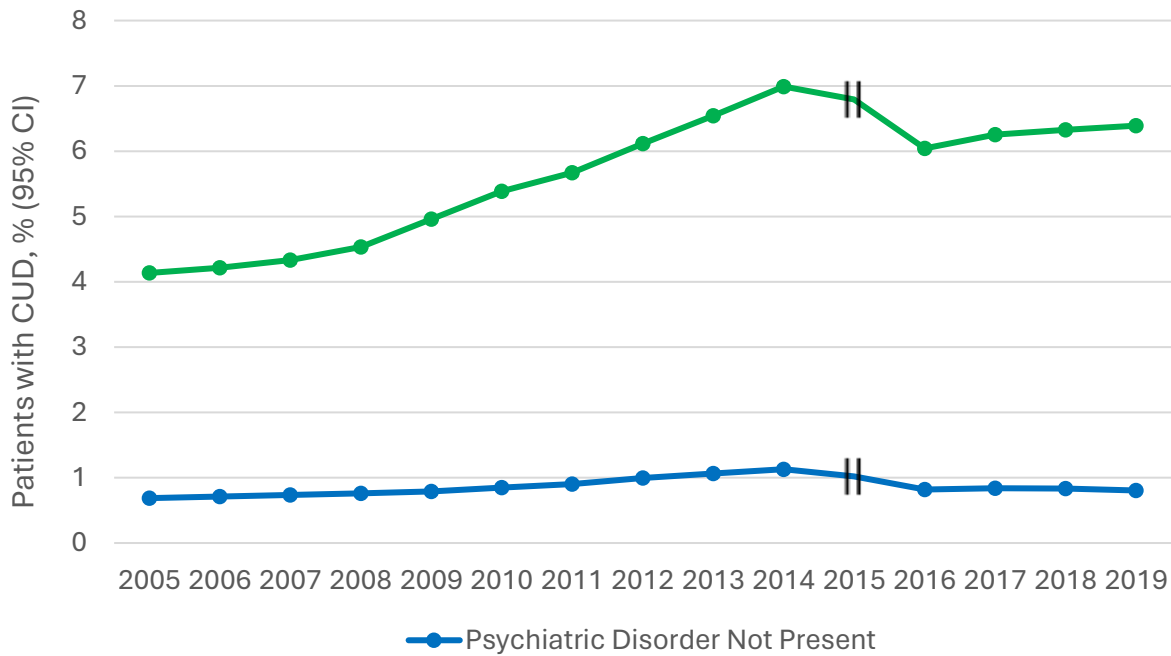



**Figure S1c.** Prevalence of CUD by Any Psychiatric Disorder, 65+ Years

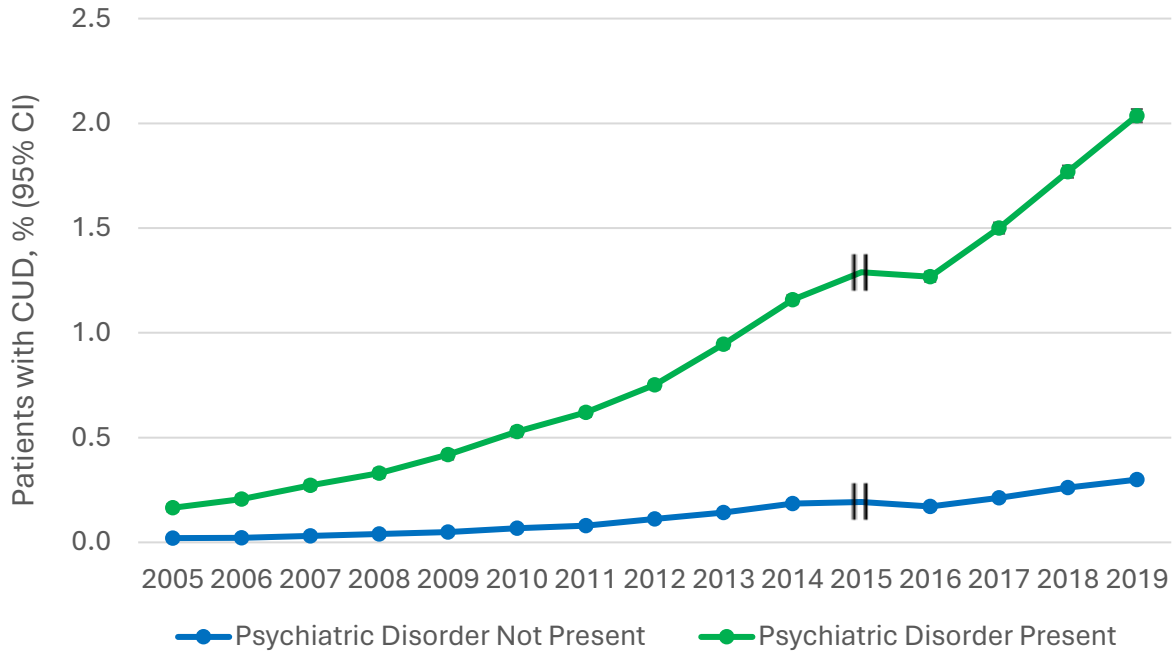

<sup>a</sup>Dichotomous psychiatric summary variable indicating if patients were positive for any disorder from  $\geq 1$  of the 5 categories (depressive disorders, anxiety disorders, PTSD, bipolar disorders, psychotic-spectrum disorders) each year, 2005-2014 and 2016-2019.

Error bars indicate 95% confidence intervals (95% CI). In cases of narrow 95% CI, error bars may be difficult to visualize.

Hatch marks at 2015 indicate that this year was not included in models due to a change in ICD coding

**Figures S2a-S2c.** Age-Stratified Trends in Prevalence of CUD by 5 Categories of Psychiatric Disorders<sup>1</sup> in VA patients, 2005-2019.

**Figure S2a. Prevalence of CUD by Psychiatric Disorders, <35 Years**

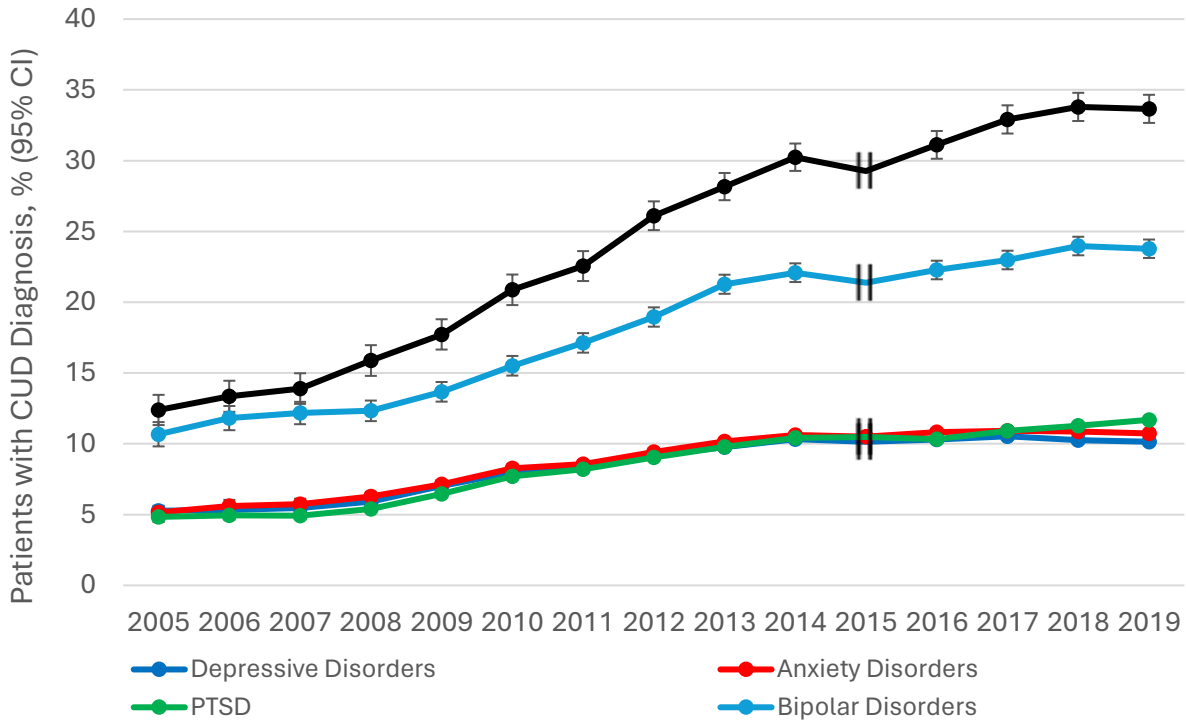

**Figure S2b. Prevalence of CUD by Psychiatric Disorders, 35-64 Years**

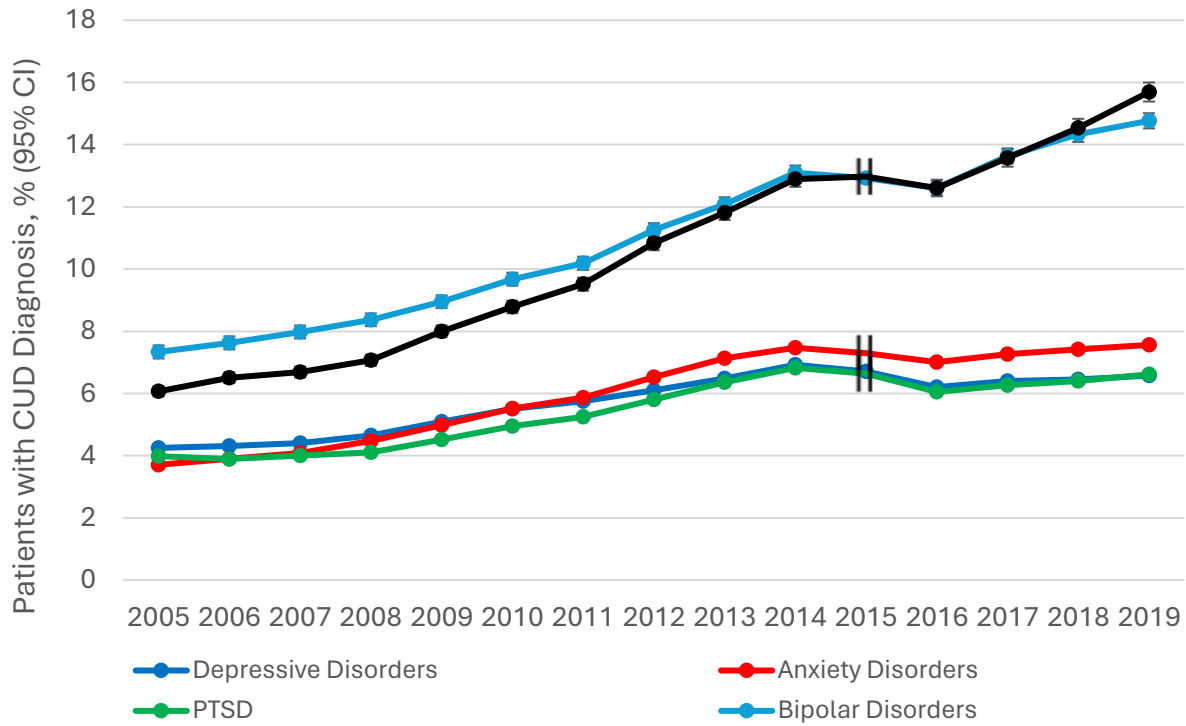

**Figure S2c.** Prevalence of CUD by Psychiatric Disorders, 65+ Years

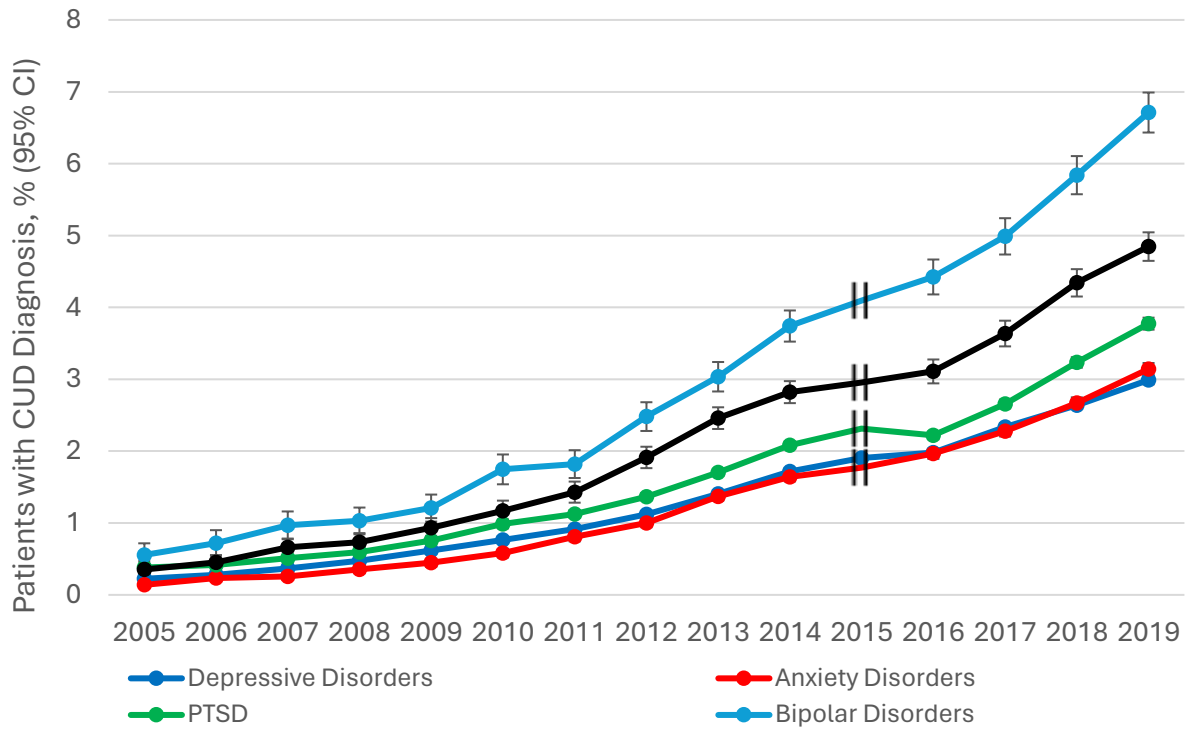

<sup>1</sup> Disorder categories are not mutually exclusive.

Error bars indicate 95% confidence intervals (95% CI). In cases of narrow 95% CI, error bars may be difficult to visualize.

Hatch marks at 2015 indicate that this year was not included in models due to a change in ICD coding.
